# Supplementary material for: c-Fos Repression by Piwi Regulates Drosophila Ovarian Germline Formation and Tissue Morphogenesis
Source: PubMed Central journal article supplement (PMC5021354; doi:10.1371/journal.pgen.1006281), 2016-09-13

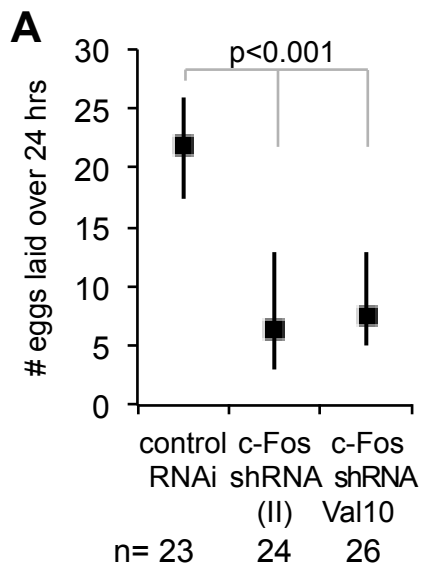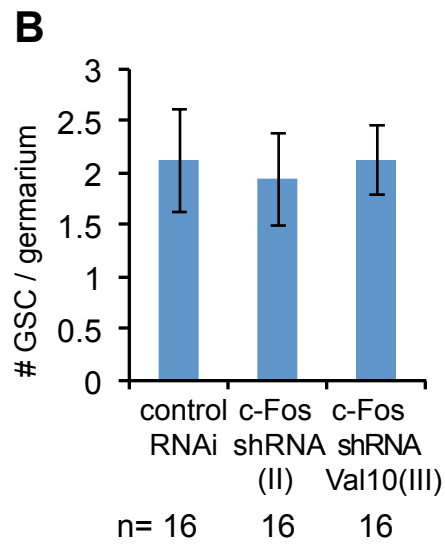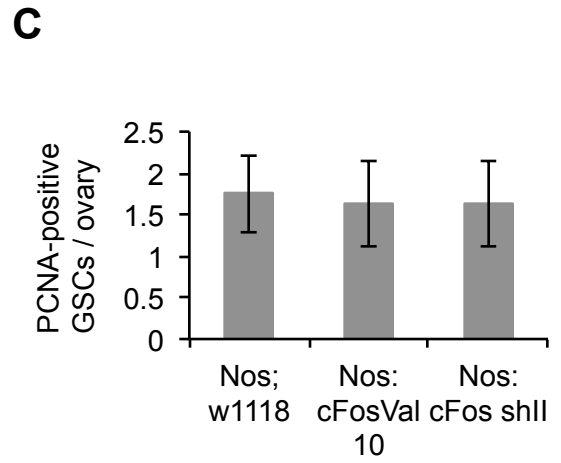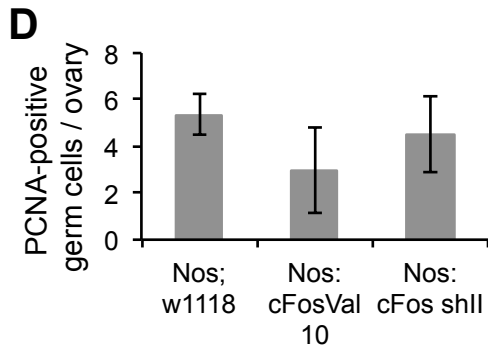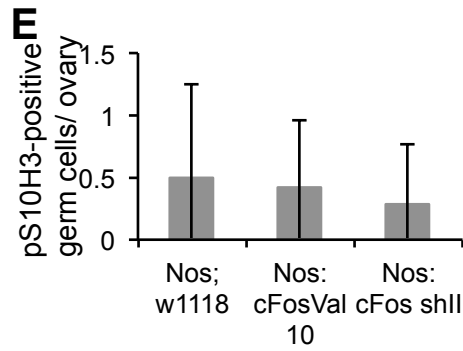

**F** oocyte specification by orb IF  
Tj:Gal4    Tj:Gal4; c-FosVal10

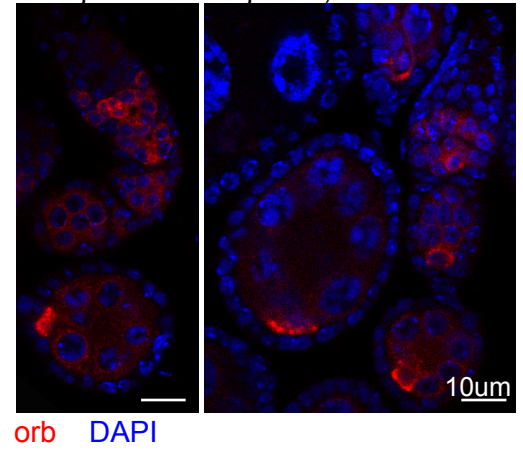

**G** meiotic double-stranded DNA breaks  
Tj:Gal4    Tj:Gal4; c-FosVal10

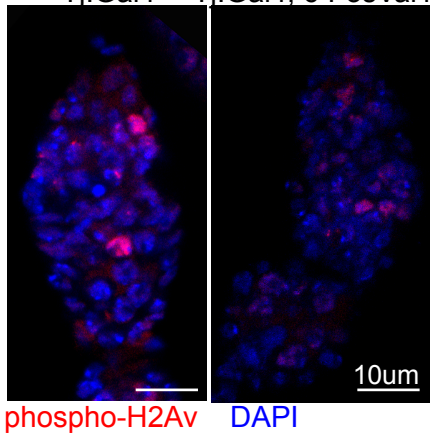

**H** ring canal structure

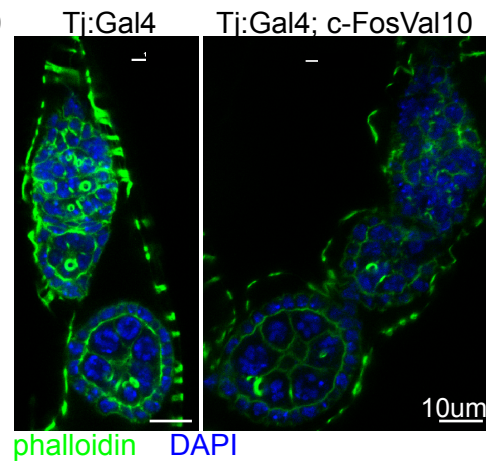

**I** oocyte axis patterning

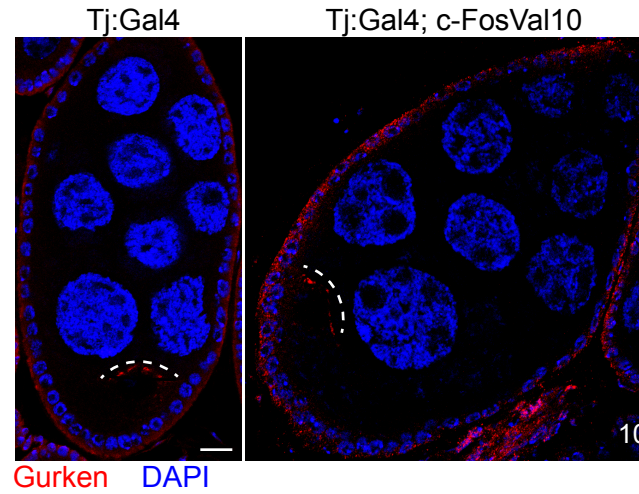

Supplement: pgen.1006281.s002.pdf [file pgen.1006281.s002.pdf]
