# Supplementary material for: c-Fos Repression by Piwi Regulates Drosophila Ovarian Germline Formation and Tissue Morphogenesis
Source: PubMed Central journal article supplement (PMC5021354; doi:10.1371/journal.pgen.1006281), 2016-09-13

**A** RNA-seq data to compare control and siRNAs in OSC lines:

Sienski et al., 2012, GSE41729

Ohtani et al., 2013, GSE 47006

FPKM (Fragments Per Kilobase of exon per Million exon-mapped fragments) values of c-Fos:

| OSCs           | control | siPiwi  | siArmi  | siMael  |
|----------------|---------|---------|---------|---------|
| Sienski et al. | 32.8258 | 43.3448 | 35.2957 | 31.5152 |
| Ohtani et al.  | 54.1401 | 53.4492 | 56.0205 | 54.6634 |

| ovarian cells | wt -1  | wt -2   | wt -2  | <i>piwi</i> -1 | <i>piwi</i> -2 | <i>piwi</i> -3 | <i>c-Fos</i> OE-1 | <i>c-Fos</i> OE-2 | <i>c-Fos</i> OE-3 |
|---------------|--------|---------|--------|----------------|----------------|----------------|-------------------|-------------------|-------------------|
| our study     | 12.509 | 11.5167 | 13.667 | 34.1743        | 32.2791        | 36.0713        | 78.041            | 67.427            | 64.797            |

*piwi*/wt=3.4 FDR = 2.56x10<sup>-5</sup>

**B** Unsupervised gene expression clustering

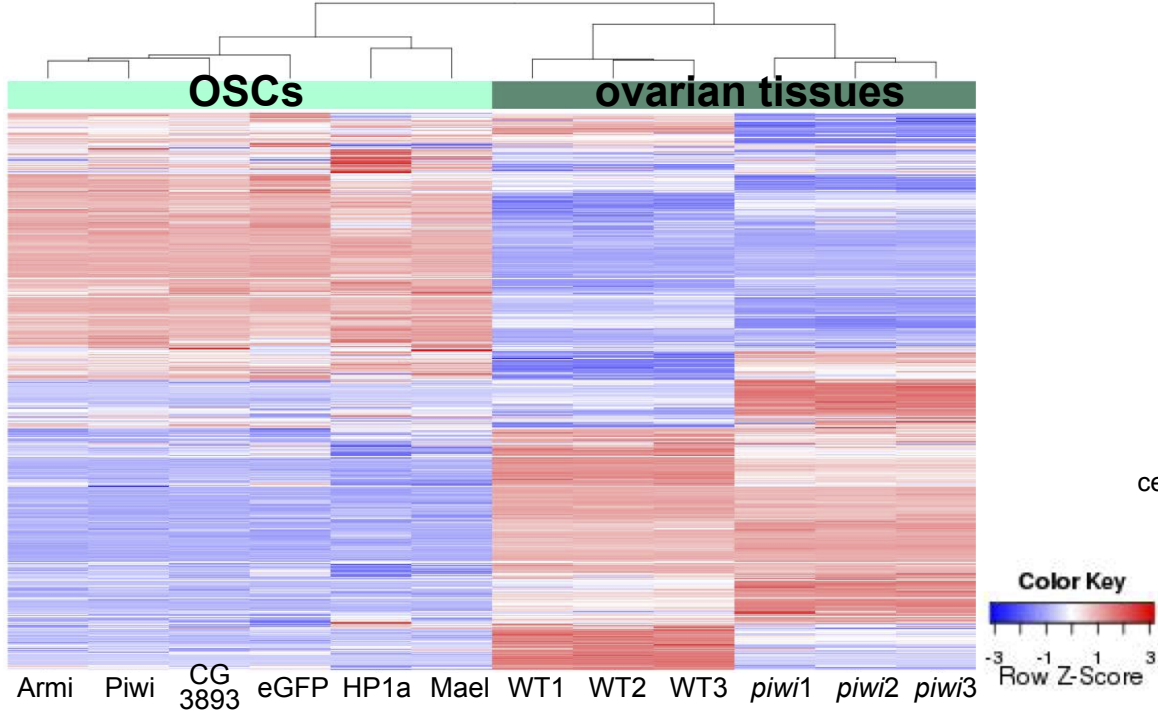

**C** Up-regulated in germline vs. OSCs

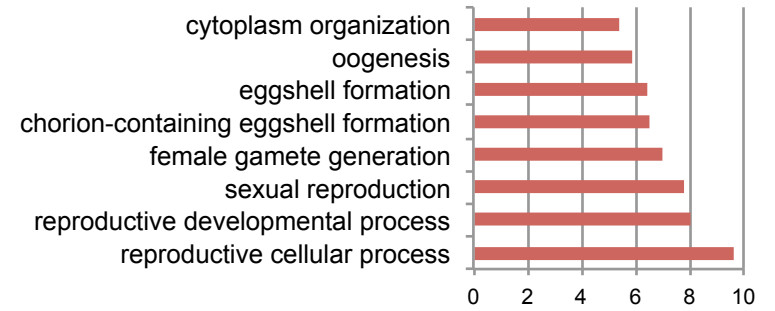

Down-regulated in germline vs. OSCs

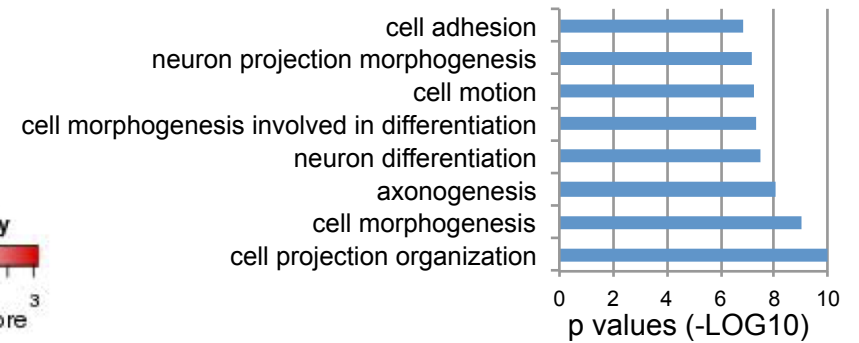

Supplement: pgen.1006281.s007.pdf [file pgen.1006281.s007.pdf]
