# Supplementary material for: c-Fos Repression by Piwi Regulates Drosophila Ovarian Germline Formation and Tissue Morphogenesis
Source: PubMed Central journal article supplement (PMC5021354; doi:10.1371/journal.pgen.1006281), 2016-09-13

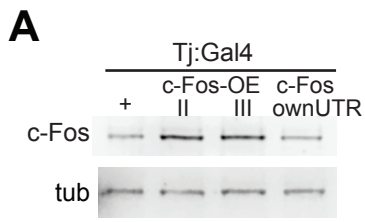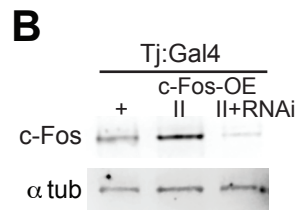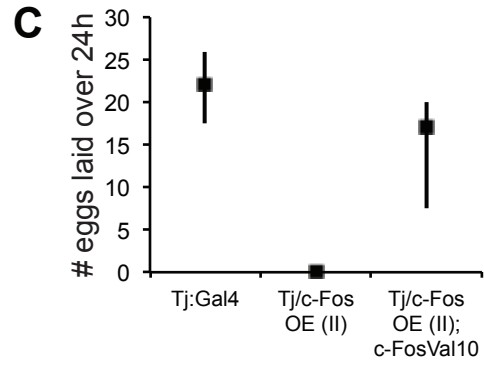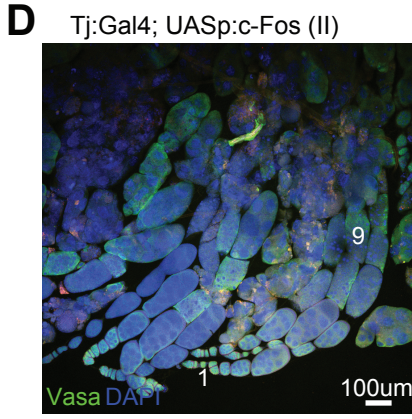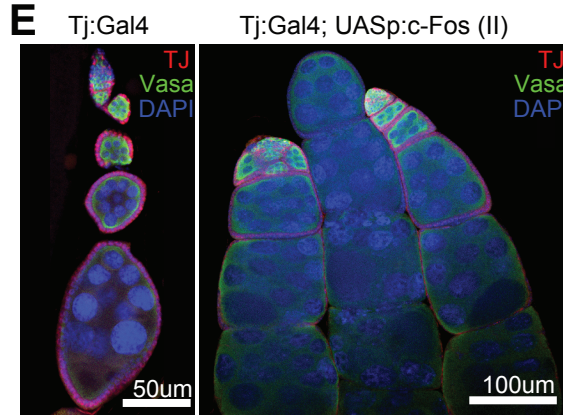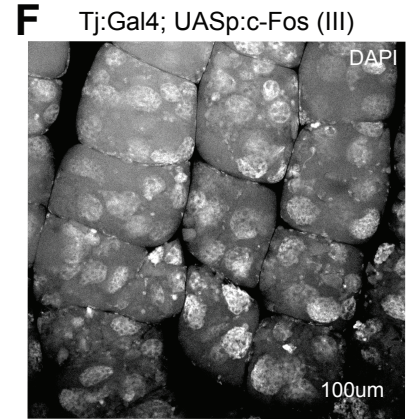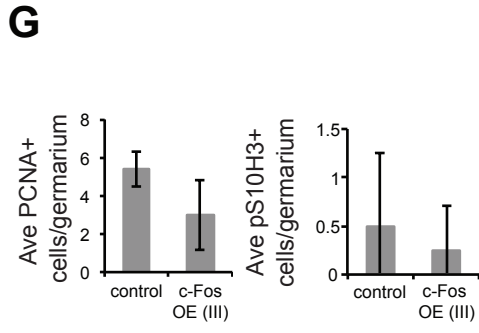

Supplement: pgen.1006281.s009.pdf [file pgen.1006281.s009.pdf]
