# Supplementary material for: c-Fos Repression by Piwi Regulates Drosophila Ovarian Germline Formation and Tissue Morphogenesis
Source: PubMed Central journal article supplement (PMC5021354; doi:10.1371/journal.pgen.1006281), 2016-09-13
Supplement: pgen.1006281.s010.pdf [file pgen.1006281.s010.pdf]

**Supplemental Table 1. Sequences of primers used for RT-qPCR**

| <b>Primers for RT-qPCR</b> |                            |              |                           |
|----------------------------|----------------------------|--------------|---------------------------|
| Gypsy-F                    | gttcatacccttgtagtagc       | Gypsy-R      | caacttacgcatatgtgagt      |
| Gypsy6-F                   | gacaagggcataaccgatactgtgga | Gypsy6-R     | aatgattctgttccggactccgtct |
| 412-F                      | caccggttggtcgaaag          | 412-R        | ggacatgcctggtatatttg      |
| rp49-F                     | ccgcttcaaggacagtatctg      | rp49-F       | atctcgccgcagtaaacgc       |
| Rpl40-F                    | agggtggactccttctgaat       | Rpl40-R      | atcagcagcgtctgatcttc      |
| c-Fos 1-F                  | cccagtggtcctcgatgt         | c-Fos 1-R    | acaaccacagcgacaacttt      |
| c-Fos 1-R                  | aacaaccacagcgacaactt       |              |                           |
| c-Fos ORFa-F               | tgtacgaagcgttgagtagcc      | c-Fos ORFa-R | tgctaccaacgccattgat       |
| c-Fos ORFb-F               | tgctcgtggaggagctgttc       | c-Fos ORFb-R | accggcacctcaacttga        |
| c-Fos UTRa-F               | gggccgagtcaggattaagt       | c-Fos UTRa-R | aagtgcttcgcggttccct       |
| c-Fos UTRb-F               | aaacctctcattgcgcggt        | c-Fos UTRb-R | tcctgcaaatactacagccc      |
| GFP UTRa-F                 | aagcagcagcacttctcaa        | GFP UTRa-R   | cggccatgatatagacgttg      |
| GFP UTRb-F                 | cgtctatatcatggccgaca       | GFP UTRb-R   | ggactgggtgctcaggtagt      |
