# Supplementary material for: c-Fos Repression by Piwi Regulates Drosophila Ovarian Germline Formation and Tissue Morphogenesis
Source: PubMed Central journal article supplement (PMC5021354; doi:10.1371/journal.pgen.1006281), 2016-09-13
Supplement: pgen.1006281.s011.pdf [file pgen.1006281.s011.pdf]

**Supplemental Table 2. Sequences of primers used for ChIP-qPCR**

| <b>Primer name</b>    | <b>Primer sequence</b> | <b>Primer name</b>    | <b>Primer sequence</b> |
|-----------------------|------------------------|-----------------------|------------------------|
| c-Fos promoter-ChIP1f | ggttgagcgagacaaagat    | c-Fos promoter-ChIP1r | gttggaatgtctggctt      |
| c-Fos promoter-ChIP2f | ataatcgccaactggagagc   | c-Fos promoter-ChIP2r | accatctgaccctgtcctc    |
| Intergenic-ChIP1f     | ggcgagagggtcattaacat   | Intergenic-ChIP1r     | atcttcgggactcctgtg     |
| Intergenic-ChIP2f     | acagctggctaactgggagt   | Intergenic-ChIP2r     | ttggcataggtggaaatgaa   |
| rp49 promoter-ChIP1f  | ttccgaccacgttacaagaa   | rp49 promoter-ChIP1r  | aagaagcgcaaggagattgt   |
| RPL40 promoter-ChIP1f | cgaaaaatcgcaataacgtg   | RPL40 promoter-ChIP1r | ttcgacagaaacagctccac   |
